# Supplementary material for: Dehydration-Induced Supralithostatic Fluid Overpressure in Metapelites from Northern Korea
Source: Research Square preprint supplement (doi:10.21203/rs.3.rs-4677052/v1), 2024-08-23
Supplement: Supplementary file 1 [file b56c1b92c2c7fd0b12dd939a.xlsx]

## Sheet: T1
Supplementary Table T1 Representative compositions of garnet
Texture	Bulk garnet								Chemical dyke
	14NK01				14NK02				14NK01						14NK02
	Core	Core	Outmost rim		Core	Core	Rim
SiO2	37.018	38.12	37.82		37.824	37.996	38.164		35.6138	37.707	37.595	37.617	35.4005		38.425	38.369	35.315	35.4534	35.2808
TiO2	0.028	0.015	0		0.012	0	0.018		0.103651	0	0	0	0.116539		0.07	0.168	0.0823027	0.0772626	0.0969561
Al2O3	20.772	21.175	20.752		21.271	21.642	21.176		21.7376	20.931	20.86	21.118	21.8313		21.439	21.553	21.7401	21.7393	21.7008
FeOT	31.827	32.432	31.842		31.968	32.509	32.32		31.8602	31.546	31.49	31.207	30.6994		31.04	30.43	31.524	31.3259	32.2793
MnO	1.012	1.198	2.241		1.177	1.167	1.171		1.10897	1.08	1.121	1.063	1.02858		1.125	1.132	1.06181	1.03898	1.1002
MgO	5.36	5.104	5.314		5.528	5.581	5.512		3.74252	4.151	4.131	3.929	3.32997		3.281	3.381	3.57864	3.7818	3.99765
CaO	2.469	3.135	2.21		2.474	2.42	2.33		4.96017	4.399	4.393	4.786	6.72379		5.26	5.896	5.78354	5.65441	4.66512
Total	98.486	101.179	100.179		100.254	101.315	100.691		99.127	99.814	99.59	99.72	99.13		100.64	100.929	99.0853	99.071	99.1208
O	12	12	12		12	12	12		12	12	12	12	12		12	12	12	12	12
Si	2.94183	2.98078	2.98966		2.97644	2.9592	2.99487		2.85514	2.99936	2.99676	2.9947	2.83337		3	3.0003	2.83093	2.83873	2.82729
Ti	0.00167376	0.000882262	0		0.000710298	0	0.00106249		0.00625049	0	0	0	0.00701607		0.00416006	0.00993211	0.00496265	0.00465335	0.00584435
Al	1.94554	1.95144	1.93337		1.97276	1.9865	1.9585		2.05389	1.96224	1.95971	1.98142	2.05934		1.99633	1.99648	2.05394	2.05148	2.04957
Fe3+	0.0850776	0.0761449	0.0788164		0.0621722	0.0850634	0.0436869		0.223325	0.0390394	0.0441954	0.0291845	0.257312		0	0	0.27326	0.260121	0.281463
Fe2+	2.03015	2.04469	2.0262		2.04161	2.0323	2.07736		1.91274	2.05945	2.05499	2.04849	1.79753		2.05093	2.00014	1.84007	1.8375	1.88181
Mn	0.0681194	0.0793449	0.150047		0.0784498	0.0769825	0.0778333		0.0753033	0.0727638	0.0756854	0.0716782	0.0697297		0.0752853	0.0753588	0.0720943	0.0704626	0.074677
Mg	0.635007	0.594972	0.626224		0.648495	0.647973	0.644824		0.447283	0.49223	0.490891	0.466293	0.397322		0.386444	0.396147	0.427659	0.451413	0.477579
Ca	0.210232	0.262656	0.187182		0.208595	0.201941	0.195908		0.426068	0.374916	0.375194	0.408239	0.576608		0.445278	0.496516	0.496749	0.485095	0.40056
Total	7.91763	7.99091	7.9915		7.98924	7.98996	7.99404		8	8	7.99742	8	7.99823		7.99432	7.99024	7.99966	7.99946	7.99878
XMg	0.230892	0.219077	0.229282		0.235621	0.23432	0.233136		0.189525	0.192904	0.192818	0.185421	0.181024		0.15855	0.165317	0.188585	0.197217	0.202417
Alm	0.689704	0.685755	0.677738		0.68576	0.686774	0.693395		0.668464	0.68663	0.685737	0.684038	0.632669		0.695382	0.67522	0.648695	0.64599	0.663865
Sps	0.0224922	0.0259483	0.0488995		0.0258116	0.0252877	0.0256063		0.026317	0.0242598	0.0252558	0.023935	0.0245424		0.025452	0.0253891	0.025416	0.0247718	0.0263446
Prp	0.215731	0.199544	0.209464		0.217824	0.218969	0.215233		0.156316	0.164112	0.163807	0.155706	0.139843		0.127118	0.130932	0.150766	0.158699	0.168481
Grs	0.0657623	0.084404	0.0599046		0.0675671	0.0651241	0.0637749		0.1343	0.12256	0.122442	0.134342	0.180404		0.152302	0.16812	0.15456	0.151349	0.124247
Note: FeOT is total FeO, and Fe3+ is estimated by stoichiometric calculation of Droop (1987).

## Sheet: T2
Supplementary Table T2 Representative compositions of plagioclase
Texture	14NK01						14NK02
	Plmc	Plmc	Plmc	Plr	Plr		Plin	Plmc	Plmc	Plr	Plr
SiO2	58.274	59.53	58.924	59.276	58.216		58.629	58.941	58.899	59.575	58.258
TiO2	0.02	0.047	0.018	0	0.006		0.013	0.007	0.023	0	0.006
Al2O3	24.884	25.472	24.489	26.145	25.6		24.576	24.481	25.089	25.749	23.66
FeOT	0.124	0.049	0.038	0	0.088		0.023	0.027	0.06	0.021	0
MnO	0.013	0	0.004	0.009	0.013		0.005	0	0	0	0
MgO	0.006	0.021	0.014	0	0		0.012	0	0.042	0	0
CaO	7.19	7.129	6.801	7.941	8.148		7.055	7.075	7.27	7.732	7.315
Na2O	7.271	7.407	7.479	7.069	6.709		7.284	7.299	7.377	7.292	6.874
K2O	0.085	0.119	0.094	0.084	0.101		0.123	0.097	0.075	0.073	0.08
Total	97.867	99.774	97.861	100.524	98.881		97.72	97.927	98.835	100.442	96.193
O	8	8	8	8	8		8	8	8	8	8
Si	2.655	2.65254	2.681	2.63129	2.629		2.673	2.67957	2.655	2.64648	2.692
Ti	0.001	0.00157552	0.001	0	0		0	0.000239412	0.001	0	0
Al	1.336	1.33766	1.313	1.36784	1.363		1.32	1.3117	1.333	1.3481	1.288
Fe	0.005	0.00182595	0.001	0	0.003		0.001	0.00102655	0.002	0.000780175	0
Mn	0.001	0	0	0.00033839	0		0	0	0	0	0
Mg	0	0.00139493	0.001	0	0		0.001	0	0.003	0	0
Ca	0.351	0.340351	0.332	0.377692	0.394		0.345	0.344625	0.351	0.368018	0.362
Na	0.642	0.639903	0.66	0.608406	0.587		0.644	0.643365	0.645	0.628055	0.616
K	0.005	0.00676442	0.005	0.00475693	0.006		0.007	0.00562572	0.004	0.004137	0.005
Total	4.999	4.99427	4.994	4.99031	4.985		4.992	4.98814	5	4.99557	4.971
An	0.352	0.344827	0.333	0.381178	0.399		0.346	0.34684	0.351	0.367941	0.369
Ab	0.643	0.648319	0.662	0.614021	0.595		0.647	0.647499	0.645	0.627923	0.627
Or	0.005	0.00685339	0.005	0.00480084	0.006		0.007	0.00566186	0.004	0.00413613	0.005
Note: Plin is plagioclase inclusions within garnet, and plmc and plmr denote core and rim domains of matrix-type plagioclase, respectively

## Sheet: T3
Supplementary Table T3 Representative compositions of staurolite
Texture	14NK01							14NK02
	Stin	Stin	Stm	Stm	Stse	Stse		Stin	Stin	Stm	Stse	Stse	Stse
SiO2	27.654	28.0213	28.1161	28.2024	28.2018	28.0784		26.859	28.008	27.857	27.677	27.952	27.947
TiO2	0.615118	0.854268	0.641264	0.706795	0.863592	0.668486		0.613	0.568	0.542	0.584	0.618	0.58
Al2O3	52.6461	52.646	52.8427	52.1769	51.6527	53.1663		49.88	52.864	51.988	51.443	52.989	52.183
Cr2O3	0.114072	0.0685163	0.0956676	0.0529672	0.0565127	0.026158		0.923	0.1	0.51	1.302	0.283	0.159
FeOT	12.1336	12.4946	12.228	12.6306	12.8863	12.7447		12.305	12.598	11.816	12.064	12.082	12.084
MnO	0.199761	0.182378	0.192807	0.247204	0.168052	0.217932		0.228	0.234	0.218	0.187	0.261	0.259
MgO	2.16544	2.42945	2.76624	2.49495	2.14093	2.118		2.21	2.415	2.781	2.524	2.167	1.99
CaO	0.0231753	0.00165365	0.0125688	0.0430194	0.0135511	0.0079025		0	0.016	0.022	0.012	0.034	0.027
NiO	0.00331323	0.0209833	0.0365292	0.00516513	0.000787152	0.00146496		0	0.028	0.015	0.013	0.019	0.036
Na2O	0.0226146	0.0130198	0.0355668	0.0228885	0.0387994	0.0295067		0	0.031	0.054	0.032	0	0.002
K2O	0.00604432	0.00171816	0.0196506	0.00877482	0.0127811	0.00977918		0	0.003	0.008	0.031	0	0.013
Total	95.5833	96.7339	96.987	96.5916	96.0357	97.0686		93.018	96.865	95.811	95.869	96.405	95.28
O	48	48	48	48	48	48		48	48	48	48	48	48
Si	8.14163	8.16463	8.16279	8.23716	8.29178	8.15693		8.176	8.155	8.186	8.16	8.15848	8.252
Ti	0.136242	0.187259	0.140062	0.155305	0.19102	0.146099		0.14	0.124	0.12	0.13	0.135702	0.129
Al	18.2673	18.0788	18.0811	17.9608	17.8986	18.2032		17.894	18.141	18.005	17.875	18.228	18.159
Cr	0.0265526	0.015784	0.0219596	0.0122313	0.0131369	0.00600805		0.222	0.023	0.118	0.304	0.0653067	0.037
Fe	2.98752	3.04465	2.96898	3.08522	3.16859	3.09636		3.132	3.068	2.904	2.975	2.9492	2.984
Mg	0.950402	1.05527	1.19724	1.08633	0.93839	0.917251		1.003	1.048	1.218	1.109	0.942897	0.876
Mn	0.0498139	0.0450096	0.0474124	0.0611552	0.0418504	0.0536243		0.059	0.058	0.054	0.047	0.0645242	0.065
Ca	0.00731056	0.000516257	0.00390977	0.0134626	0.00426893	0.00245976		0	0.005	0.007	0.004	0.0106328	0.009
Ni	0.000784669	0.00491817	0.00853112	0.00121354	0.000186171	0.000342343		0	0.007	0.004	0.003	0.004461	0.009
Na	0.0129089	0.00735526	0.0200205	0.0129615	0.0221178	0.0166196		0	0.018	0.031	0.018	0	0.001
K	0.00227017	0.000638661	0.0072781	0.00326956	0.00479401	0.00362423		0	0.001	0.003	0.012	0	0.005
Total	30.5828	30.6048	30.6593	30.6291	30.5748	30.6025		30.626	30.648	30.65	30.636	30.5592	30.524
XMg	0.241346	0.257389	0.287369	0.260415	0.228487	0.228535		0.24	0.25	0.3	0.27	0.24226	0.23
Note: Stin, staurolite inclusions within garnet chemical dykes; Stm, large matrix-type staurolite associated with kyanite; Stse, relatively small staurolite in association with brecciated garnet

## Sheet: T4
Supplementary Table T4 Representative compositions of muscovite
Texture	14NK01										14NK02
	Msin1	Msin1	Msin2	Msin2	Msin3	Msmatrix core	Msmatrix rim	Msmatrix rim	Margarite		Msin1	Msin1	Msin2	Msin2	Msin3	Msin3	Msin3	Msmatrix rim	Msmatrix rim	Msmatrix core	Msmatrix core	Margarite
SiO2	46.684	46.13	46.155	46.039	46.232	46.094	46.524	46.63	31.8712		46.6198	47.6409	46.305	47.0424	46.7257	45.7106	45.8864	46.0144	46.1895	46.6746	47.4243	31.4257
TiO2	0.618	0.53	0.948	0.986	0.63	0.939	0.526	0.45	0.0177062		0.567817	0.573395	1.17837	0.961135	0.716237	0.683233	0.621385	0.548869	0.622357	0.924581	0.947222	0.0192467
Al2O3	33.963	35.76	34.366	34.002	35.781	34.555	33.533	35.85	46.2024		36.3168	34.3165	33.8354	34.6562	35.1137	35.3976	36.1356	35.7688	34.987	35.3788	34.2327	47.1406
Cr2O3	0.136	0.04	0.05	0.038	0.052	0.181	0.107	0.05	0.01		0.041801	0.00972981	0.036909	0.0586464	0.0551388	0.0439386	0.0404939	0.0171092	0.00998174	0.0407184	0.0486032	0
FeOT	1.664	0.87	1.688	1.545	0.94	1.435	3.042	1.45	3.46379		1.1153	1.20944	1.52853	1.42837	1.19117	1.22495	1.08862	0.932424	1.01451	1.00761	1.07421	3.91379
MnO	0.037	0	0.042	0.024	0	0	0.08	0.03	0.178286		0.0143935	0.0206588	0.0262906	0.0104359	0.0191331	0.0212327	0.0146426	0.00531565	0.00830019	0.00924185	0.00702873	0.193797
MgO	0.71	0.53	1.088	0.822	0.566	0.868	1.297	0.59	0.12		0.650024	0.900427	0.806036	1.11204	0.754917	0.762	0.669629	0.561515	0.604405	0.700156	0.639609	0.15
CaO	0.135	0.09	0.033	0.037	0.066	0.042	0.156	0.1	10.2271		0.0267714	0.00466049	0.0860221	0.0156758	0.0133725	0.0626233	0.0330785	0.0274431	0.037166	0.0459472	0.0225984	10.3114
NiO	0.007	0.01	0	0	0.019	0	0.012	0	0		0.000684246	0.0114627	0.00157894	0.00620469	0.0106737	0.00776376	0.00854941	0.00440546	0.0201863	0.0127272	0.0017122	0
Na2O	0.993	1.19	1.176	1.052	1.119	1.074	0.983	1.15	1.86146		1.26148	1.07708	1.24111	1.00439	1.2065	1.24413	1.0622	1.25194	1.23772	1.06576	1.02982	1.52341
K2O	8.988	9.87	8.889	9.28	9.981	9.196	8.786	9.85	0.153636		9.24892	9.77025	9.57544	9.75133	9.44759	9.4812	9.44359	9.37872	9.39931	9.66242	9.2262	0.167002
Total	93.935	95.02	94.435	93.825	95.386	94.384	95.046	96.15	94.1057		95.8637	95.5345	94.6207	96.0468	95.2542	94.6393	95.0042	94.511	94.1304	95.5226	94.654	94.845
O	22	22	22	22	22	22	22	22	22		22	22	22	22	22	22	22	22	22	22	22	22
Si	6.27	6.136	6.174	6.176	6.13095	6.17018	6.22102	6.143	4.34032		6.12641	6.29548	6.20598	6.19927	6.19155	6.11012	6.09399	6.13676	6.18909	6.16783	6.29969	4.25427
Ti	0.06	0.053	0.095	0.15	0.062853	0.0945625	0.052914	0.045	0.00181405		0.0561364	0.0570036	0.118813	0.0952874	0.0714004	0.0687071	0.0620838	0.0550699	0.062737	0.0919172	0.0946608	0.00196018
Al	5.376	5.606	5.418	5.376	5.59234	5.45155	5.28461	5.566	7.41555		5.6247	5.34451	5.34454	5.38255	5.48373	5.57652	5.65599	5.6222	5.52518	5.50998	5.35939	7.52128
Cr	0.014	0.004	0.005	0.004	0.0054521	0.0191561	0.0113121	0.005	0.00107671		0.00434308	0.00101655	0.00391103	0.00611036	0.00577664	0.0046436	0.00425189	0.00180406	0.00105746	0.00425419	0.00510456	0
Fe	0.187	0.097	0.189	0.173	0.104251	0.160647	0.340183	0.16	0.394496		0.122573	0.13366	0.171327	0.157419	0.132003	0.136936	0.12091	0.103998	0.113686	0.111356	0.119337	0.443104
Mg	0.142	0.105	0.217	0.164	0.111895	0.173213	0.258543	0.116	0.024362		0.127343	0.17738	0.161044	0.218463	0.149125	0.151844	0.132575	0.111639	0.120731	0.137929	0.126661	0.0302719
Mn	0.004	0	0.005	0.003	0	0	0.00906067	0.003	0.0205648		0.0016021	0.00231228	0.00298448	0.00116484	0.00214741	0.00240394	0.00164711	0.000600464	0.000942014	0.00103442	0.000790826	0.0222214
Ca	0.019	0.013	0.005	0.005	0.00937783	0.00602387	0.0223503	0.013	1.49227		0.00376946	0.000659863	0.0123528	0.00221337	0.00189858	0.00896896	0.00470692	0.0039215	0.00533584	0.00650554	0.0032164	1.49566
Ni	0.001	0.001	0	0	0.00202685	0	0.00129077	0	0		7.2332e-05	0.00121848	0.000170228	0.000657738	0.00113773	0.000834809	0.000913347	0.000472628	0.00217581	0.00135291	0.00018296	0
Na	0.259	0.306	0.305	0.274	0.287715	0.278743	0.25485	0.294	0.4915		0.321412	0.275958	0.322508	0.256625	0.309968	0.322436	0.273508	0.323725	0.321554	0.27306	0.265233	0.399857
K	1.54	1.675	1.517	1.588	1.68857	1.5704	1.49877	1.655	0.0266915		1.55055	1.64707	1.6372	1.63936	1.59707	1.61679	1.59997	1.59569	1.60671	1.62891	1.56351	0.0288417
Total	13.873	13.996	13.93	13.914	13.9954	13.9245	13.9549	14.001	14.2086		13.9389	13.9363	13.9808	13.9591	13.9458	14.0002	13.9505	13.9559	13.9492	13.9341	13.8378	14.1975
XMg	0.431611	0.519802	0.534483	0.486647	0.517682	0.51882	0.431822	0.42029	0.0581628		0.509543	0.57028	0.484531	0.581201	0.530452	0.525811	0.523008	0.517716	0.515028	0.553298	0.514884	0.0639491
T* (℃)	594.111	574.627	682.408	686.47	603.276	679.151	566.325	537.98			583.112	591.319	721.335	687.222	627.181	619.779	601.616	580.612	602.65	677.097	678.746
Note: Msin1, isolated muscovite inclusion within core domains of bulk garnet; Msin2, isolated muscovite inclusion within rim domains of bulk garnet; Msin3, isolated muscovite inclusion within garnet chemical dykes; Msmatrix core, core domains of matrix-type muscovite; Msmatrix rim, rim domains of matrix-type muscovite or muscovite grains that grow inside biotite or develop along garnet phsical cr…
Reference:
Wu CM and Chen HX (2015) Calibration of a Ti-in-muscovite geothermometer for ilmenite- and Al2SiO5-bearing metapelites. Lithos, 212–215: 122–127

## Sheet: T5
Supplementary Table T5 Representative compositions of biotite and chlorite
Texture	14NK01								14NK02								14NK01		14NK02
	Btin1	Btin2	Btin3	Btmc	Btmc	Btmr	Btmr		Btin1	Btin2	Btin3	Btin3	Btmr	Btmc	Btmc		Chl		Chl
SiO2	36.453	36.826	36.484	36.145	36.223	36.249	36.284		35.287	36.401	36.52	36.644	36.817	36.517	36.539		25.911		24.604
TiO2	1.32	2.115	1.986	2.245	1.945	1.701	1.607		1.377	2.29	1.947	2.2	1.921	2.76	2.89		0.135		0.157
Al2O3	17.717	18.847	19.231	20.148	19.448	19.336	19.832		19.432	19.654	18.217	19.529	19.166	19.46	18.666		21.587		21.44
Cr2O3	0.335	0.152	0.307	0.21	0.117	0.151	0.126		0.185	0.135	0.087	0.081	0.089	0.089	0.125		0.21		0.161
FeOT	19.78	19.56	16.56	16.251	17.251	16.52	16.12		20.637	19	16.67	16.54	16.13	17.12	17.05		22.647		22.411
MnO	0.081	0.063	0.085	0.149	0.049	0.053	0.061		0.113	0.082	0.082	0.068	0.064	0.088	0.066		0.166		0.158
MgO	10.67	10.17	11.25	10.12	10.638	11.119	11.47		9	9	11.02	10.56	10.89	9.95	10.02		14.598		15.264
CaO	0.081	0.029	0.071	0.067	0.082	0.132	0.122		0.055	0.091	0.144	0.057	0.038	0.008	0.031		0.193		0.215
NiO	0.018	0	0.047	0.04	0.022	0.034	0		0.029	0.046	0.007	0.047	0.045	0.003	0.008		0.013		0.032
Na2O	0.303	0.256	0.233	0.248	0.441	0.554	0.443		0.284	0.504	0.119	0.376	0.334	0.352	0.319		0.137		0.034
K2O	7.115	8.385	8.092	8.879	8.607	8.448	8.429		8.85	8.346	8.501	8.714	8.832	8.908	8.853		0.227		0.131
Total	93.873	96.403	94.346	94.502	94.823	94.297	94.494		95.249	95.549	93.314	94.816	94.326	95.255	94.567		85.824		84.607
O	22	22	22	22	22	22	22		22	22	22	22	22	22	22		28		28
Si	5.56684	5.49143	5.47839	5.43358	5.44918	5.46402	5.43898		5.39135	5.46725	5.56343	5.48887	5.53543	5.46682	5.5126		4.326		4.178
Ti	0.151653	0.237269	0.224352	0.253895	0.220124	0.192895	0.181225		0.158277	0.258757	0.22314	0.247915	0.217285	0.310849	0.328018		0.017		0.02
Al	3.18876	3.3123	3.40336	3.56965	3.44809	3.4351	3.50368		3.4991	3.47907	3.27073	3.4476	3.39618	3.43351	3.319		4.248		4.291
Cr	0.0404478	0.0179205	0.0364471	0.0249593	0.0139158	0.0179957	0.014933		0.0223475	0.0160311	0.0104787	0.00959269	0.0105796	0.0105343	0.0149103		0.028		0.022
Fe	2.52621	2.43932	2.07959	2.04308	2.17035	2.08254	2.02086		2.63692	2.38659	2.12381	2.07197	2.02818	2.14344	2.15126		3.162		3.183
Mg	2.42912	2.26079	2.51832	2.26792	2.3857	2.49856	2.56315		2.04991	2.01515	2.50266	2.35805	2.44084	2.22061	2.2536		3.633		3.864
Mn	0.0104772	0.00795715	0.0108107	0.0189719	0.00624351	0.00676671	0.00774493		0.0146234	0.0104317	0.0105806	0.0086273	0.00815021	0.0111586	0.00843393		0.023		0.023
Ca	0.0132536	0.00463343	0.011423	0.0107916	0.013217	0.0213188	0.0195945		0.00900365	0.0146444	0.0235043	0.00914805	0.00612153	0.00128323	0.00501112		0.035		0.039
Ni	0.00221121	0	0.00567715	0.00483704	0.00266227	0.00412266	0		0.00356421	0.00555771	0.000857812	0.00566318	0.00544249	0.00036128	0.000970895		0.002		0.004
Na	0.0897149	0.0740146	0.0678348	0.072283	0.128627	0.161909	0.128752		0.0841294	0.146768	0.0351484	0.109198	0.0973635	0.102171	0.0933119		0.044		0.011
K	1.38615	1.59512	1.55012	1.70279	1.6518	1.62453	1.6119		1.72498	1.59916	1.65212	1.66516	1.69403	1.70129	1.70392		0.048		0.028
Total	15.4048	15.4408	15.3863	15.4028	15.4899	15.5098	15.4908		15.5942	15.3994	15.4165	15.4218	15.4396	15.402	15.391		15.57		15.66
XMg	0.490203	0.481009	0.547709	0.526077	0.523633	0.545406	0.559151		0.437376	0.457807	0.540944	0.532288	0.54617	0.508841	0.511617		0.534658		0.548318
T* (℃)	521.215	594.192	586.252	630	587.781	566.29	558.899		553.2	634.277	581.378	612.128	589.292	652.057	654.344
Note:Btin1, biotite inclusions within core domains of bulk garnet; Btin2, biotite inclusions within rim domains of bulk garnet; Btin3, biotite inclusions within garnet chemical dykes; Btmc, core of matrix-type biotite; Btmr, rim of matrix-type biotite. T*, temperature calculated using Ti-in-biotite geothermometer of Wu and Chen (2015).
Reference:
Wu CM and Chen HX (2015) Revised Ti-in-biotite geothermometer for ilmenite- or rutile-bearing crustal metapelites. Science Bulletin, 60: 116-121

## Sheet: T6
Supplementary Table T6 Representative compositions of amphibole in porphyritic intrusions
	Amphibole
SiO2	49.008	47.518	48.743	48.893	48.585
TiO2	1.011	1.292	1.345	1.207	1.456
Al2O3	6.721	7.499	5.937	5.226	6.735
FeOT	12.204	13.318	12.3	11.222	11.589
MnO	0.809	0.777	0.6	0.522	0.689
MgO	15.145	14.888	15.852	17.202	15.719
CaO	10.764	10.809	10.984	10.789	11.144
NiO	0.057	0.169	0.079	0.145	0.052
Na2O	1.032	1.539	1.355	2.688	1.419
K2O	0.392	0.257	0.367	0.914	0.44
Total	97.143	98.066	97.562	98.808	97.828
O	23	23	23	23	23
Si	7.14685	6.93469	7.10395	7.06468	7.0451
Ti	0.110917	0.141851	0.147472	0.131206	0.158835
Al	1.15515	1.28982	1.01979	0.889962	1.15101
Fe	1.48839	1.62546	1.49921	1.35608	1.4054
Mg	3.2925	3.23902	3.44414	3.70538	3.39796
Mn	0.0999268	0.0960452	0.074067	0.0638855	0.0846233
Ca	1.68188	1.69016	1.71523	1.67032	1.73141
Ni	0.00668659	0.0198398	0.00926184	0.0168537	0.00606555
Na	0.291792	0.435466	0.38289	0.753046	0.398946
K	0.0729277	0.0478477	0.0682358	0.168481	0.0813947
Total	15.347	15.5202	15.4642	15.8199	15.4607
XMg	0.688679	0.665851	0.696722	0.732078	0.707414
T* (℃)	696.04	739.751	746.83	725.031	761.229
P1 (kbar)	1.89039	2.56779	1.20955	0.556507	1.86957
P2 (kbar)	2.48833	3.12875	1.84343	1.22578	2.46772
P3 (kbar)	2.21005	2.58224	1.87232	0.6	2.19918
Note: T*, temperature calculated using the Ti-in-Amp thermometer (Liao et al., 2021); P1, P2 and P3 are pressures calculated using Al-in-Amp barometers of Hammarstrom and Zen (1986), Anderson and Smith (1995), and Mutch et al. (2016), respectively.
References:
Anderson, L.J. and Smith, R.D. (1995) The effects of temperature and fO2 on the Al-in-hornblende barometer. American Mineralogist, 80: 549-559.
Hammarstrom, J. M. & Zen, E. A. (1986). Aluminum in Hornblende - an Empirical Igneous Geobarometer. American Mineralogist 71, 1297-1313.
Liao, Y., Wei, C. & Rehman, H. U. (2021). Titanium in calcium amphibole: Behavior and thermometry. American Mineralogist 106, 180-191.
Mutch, E. J. F., Blundy, J. D., Tattitch, B. C., Cooper, F. J. & Brooker, R. A. (2016). An experimental study of amphibole stability in low-pressure granitic magmas and a revised Al-in-hornblende geobarometer. Contributions to Mineralogy and Petrology 171.

## Sheet: T7
Supplementary Table T7 Zircon U-Pb isotopes, trace elements and Ti-in-zircon results
spot #	Comment	Th (ppm)	U (ppm)	Th/U	Pb total (ppm)	Pb common (ppm)	207Pb/206Pb	±s	207Pb/235U	±s	206Pb/238U	±s	r	207Pb/206Pb (age/Ma)	±s	207Pb/235U (age/Ma)	±s	206Pb/238U (age/Ma)	±s	Concordance	Elements (ppm)	P	Ti	Y	Nb	La	Ce	Pr	Nd	Sm	Eu	Gd	Tb	Dy	Ho	Er	Tm	Yb	Lu	LuN/GdN	Eu/Eu*	T*(℃)
14NK01-01		87.6404	655.229	0.133755	224.798	0.307636	0.111728	0.00180348	4.80451	0.0773146	0.310661	0.00208465	0.416998	1827.47	29.475	1785.69	13.579	1743.96	10.2964	97%		375.99	4.47266	587.785	1.0613	0.0221563	1.40442	0.0336265	0.849113	3.07595	0.176999	24.2332	8.15228	71.4943	20.0871	67.0089	11.7812	95.504	17.7759	5.93468	0.0626755	675.385
14NK01-02		63.4608	660.407	0.0960935	237.823	0	0.113341	0.00193289	5.13665	0.0963125	0.326823	0.00298199	0.486621	1853.4	25.4625	1842.19	15.9852	1822.96	14.5215	98%		413.609	6.94232	650.721	1.29242	0.0206377	1.74303	0.0383743	0.687029	3.09521	0.15401	19.8662	7.13872	70.138	21.4546	81.5432	16.372	157.869	31.8556	12.9733	0.060044	712.578
14NK01-03		40.1726	398.412	0.100832	141.118	0.0401971	0.1123	0.00217615	5.00282	0.094089	0.321695	0.00240579	0.397639	1836.73	30.5575	1819.8	15.9633	1798	11.7741	98%		302.584	4.4666	363.768	0.600693	0.0236016	0.748303	0.035111	0.568669	2.24927	0.0566124	14.5621	4.69381	43.4919	11.9958	42.82	7.76047	65.3875	12.3598	6.867	0.0302414	675.275
14NK01-04		68.793	519.201	0.132498	187.401	0.292871	0.110798	0.00207603	5.00384	0.0919903	0.325834	0.00209071	0.349028	1812.96	28.55	1819.97	15.6067	1818.16	10.2127	99%		386.123	5.10593	565.13	0.895109	0	1.26137	0.0395217	0.904914	2.96644	0.166206	20.9904	6.34616	63.3398	19.0169	69.5328	12.9955	109.484	20.6023	7.94096	0.0643933	686.289
14NK01-05		43.5989	472.112	0.0923487	162.87	0.0509593	0.11205	0.00192304	4.86366	0.0899292	0.313577	0.00319618	0.551251	1833.03	26.855	1795.98	15.6204	1758.29	15.714	97%		377.106	5.86652	471.553	0.858951	0.00492609	0.639972	0.0366529	0.468439	2.43784	0.118159	16.7411	5.73424	55.6969	15.7412	56.2815	10.2773	83.5804	15.5949	7.53664	0.0565451	697.995
14NK01-06		48.1817	488.011	0.0987307	173.755	0.0751841	0.115087	0.00180288	5.11109	0.080751	0.321219	0.00195829	0.385871	1881.17	27.62	1837.95	13.4752	1795.68	9.60386	97%		351.878	5.8822	547.236	0.988162	0.0105208	0.869095	0.0423823	0.731382	2.17567	0.220809	19.8013	7.96163	73.419	17.9155	55.396	8.90549	72.9592	12.9246	5.28081	0.102848	698.223
14NK01-07		55.193	585.661	0.0942404	204.062	0.522674	0.114697	0.00184317	5.01731	0.0826691	0.316505	0.00181034	0.347141	1875.93	24.9975	1822.25	14.0048	1772.64	8.91605	97%		395.242	4.33593	583.105	1.03062	0.0107185	0.922886	0.0372259	0.543355	2.9922	0.179966	22.2253	6.94047	66.088	19.547	69.4039	12.9617	106.143	20.1417	7.33208	0.0674674	672.865
14NK01-08		44.2561	563.127	0.0785899	186.989	0.210211	0.114287	0.00193404	4.78006	0.0866914	0.302825	0.00231017	0.42064	1868.83	30.0925	1781.4	15.2772	1705.3	11.4678	95%		428.886	4.93026	629.272	1.06552	0.0324913	0.7773	0.0591135	0.512574	2.20217	0.181845	20.6058	7.46561	74.3181	21.1334	67.6135	11.7665	96.2204	18.1015	7.10731	0.0825288	683.382
14NK01-09		24.7266	652.863	0.0378741	220.189	0	0.115088	0.00216709	4.91873	0.0975776	0.309579	0.00217044	0.35341	1881.17	33.6375	1805.48	16.7848	1738.64	10.7252	96%		408.287	3.49115	640.33	0.753735	0.0147205	0.567468	0.0253109	0.310227	1.73112	0.133878	14.3247	6.99464	76.2652	21.1426	66.1305	10.8689	84.0993	14.6071	8.25006	0.0821915	655.637
14NK01-10		54.112	541.549	0.0999208	186.813	0	0.112885	0.00318461	4.89715	0.102548	0.313055	0.00258303	0.394026	1846.61	51.7	1801.77	17.6994	1755.72	12.7167	97%		336.957	5.43374	525.402	1.03883	0.0243276	0.944262	0.0336396	0.616662	2.31702	0.175053	18.5097	6.39245	61.2591	17.5359	63.6425	12.005	98.9003	18.9089	8.26502	0.0817199	691.499
14NK01-11		30.4494	381.143	0.0798898	118.414	0.196842	0.113008	0.00191347	4.41215	0.0774071	0.283129	0.00188987	0.380468	1850.01	31.02	1714.62	14.5692	1607.1	9.53426	93%		278.538	4.66594	284.956	0.54755	0.0280408	0.665671	0.0351664	0.498838	1.72523	0.118113	11.2977	3.80911	32.6985	9.36801	30.7097	5.48521	45.4573	8.11628	5.81225	0.0817902	678.842
14NK01-12		91.8844	961.734	0.0955403	312.913	0.145608	0.116438	0.00189251	4.65528	0.0854619	0.289572	0.00241404	0.45411	1902.16	29.325	1759.24	15.3909	1639.39	12.0999	92%		313.516	9.43809	486.783	1.63693	0.00939774	4.02995	0.0220929	0.516965	1.3879	0.269422	11.4613	4.27778	49.1708	15.367	60.3938	12.1765	121.4	24.8917	17.5712	0.206519	740.339
14NK01-13		35.5732	349.929	0.101658	119.027	0	0.11539	0.00188262	4.86129	0.0869034	0.305347	0.00262299	0.480528	1887.04	29.6275	1795.57	15.1042	1717.77	12.9867	95%		265.414	6.11857	339.527	1.43471	0.0245653	1.37983	0.0256128	0.479405	1.57405	0.0756143	13.3857	3.874	38.3584	11.644	41.7793	7.90434	72.587	14.52	8.77617	0.0503614	701.598
14NK01-14		42.297	480.095	0.0881013	164.258	0	0.115427	0.00181185	4.87213	0.081751	0.306158	0.00265339	0.516513	1887.04	28.0825	1797.45	14.1888	1721.77	13.1285	95%		347.366	7.36574	464.972	0.667071	0.0154938	0.71903	0.0288496	0.5841	2.04152	0.137154	16.835	5.58509	53.2906	15.4768	56.7336	10.373	85.5614	16.0752	7.7254	0.0715238	717.811
14NK01-15		51.5798	506.351	0.101866	170.307	0	0.114029	0.00190481	4.76449	0.0824621	0.302868	0.00213	0.406338	1864.51	29.78	1778.66	14.5755	1705.51	10.5791	95%		356.3	4.98068	480.228	0.906481	0.0203105	0.90955	0.0380743	0.717264	2.83074	0.172403	17.791	5.7007	54.8614	15.7243	60.081	11.4394	100.022	19.2365	8.7479	0.0742709	684.225
14NK01-16		53.0565	564.168	0.0940439	178.722	0.218859	0.114629	0.00203962	4.54043	0.0882531	0.287072	0.00269337	0.482695	1873.77	31.635	1738.41	16.2171	1626.88	13.5186	93%		394.077	4.4948	577.128	1.19914	0.0381026	1.02671	0.0397366	0.794188	2.323	0.271881	18.9547	6.30761	63.8107	19.5696	70.7185	13.1132	113.598	21.568	9.206	0.125262	675.787
14NK01-17		30.8827	280.495	0.1101	95.5197	0.128053	0.112824	0.0021544	4.73819	0.0932588	0.304429	0.00237388	0.396183	1855.56	34.5675	1774.02	16.5463	1713.23	11.768	96%		225.226	3.8964	208.862	0.452692	0.019981	0.808884	0.0362459	0.481191	1.66247	0.0837676	9.92034	2.85063	25.559	6.85661	21.5753	3.46628	27.1911	4.79348	3.90933	0.0630607	664.288
14NK01-18		44.0299	526.341	0.0836529	170.259	0.528904	0.11264	0.00198301	4.54617	0.0862809	0.292496	0.00272851	0.491514	1842.29	31.7925	1739.46	15.8404	1653.99	13.6379	94%		413.795	3.81611	575.225	0.79774	0.00370995	0.737682	0.0261412	0.460597	2.60637	0.150527	19.9864	6.39853	63.5299	18.9455	74.6808	14.6573	124.242	23.8293	9.64613	0.0637606	662.636
14NK01-19		33.9692	402.632	0.084368	128.449	0.114182	0.114375	0.00193817	4.49874	0.0776993	0.284995	0.00198981	0.404247	1870.06	31.325	1730.74	14.3959	1616.47	10.0203	93%		284.795	5.01711	270.35	0.582154	0.0183584	0.680472	0.0312706	0.455826	1.6121	0.107878	12.8985	3.96091	34.8444	8.84711	28.1119	4.78807	36.3789	6.18603	3.88018	0.0723252	684.829
14NK01-20		54.4248	554.383	0.0981718	183.986	0	0.114713	0.00183077	4.72345	0.0770795	0.298215	0.00206838	0.425032	1875.93	29.4725	1771.41	13.7274	1682.45	10.3109	94%		374.674	3.93708	508.058	0.792884	0.0553315	1.01663	0.0659787	0.801369	1.98153	1.75605	18.024	6.1991	59.8989	17.0995	57.3865	10.5404	85.9727	15.8572	7.1179	0.898326	665.115
14NK01-21		36.5001	334.461	0.109131	116.04	0.382547	0.113887	0.00195166	4.8425	0.0808092	0.308082	0.00211434	0.41126	1862.04	31.48	1792.31	14.0968	1731.26	10.4616	96%		221.269	4.91007	276.063	0.605372	0	0.752945	0.0209953	0.374657	2.0369	0.106973	13.9774	3.91375	33.2808	8.62546	28.4324	5.02444	39.2966	6.90354	3.99598	0.0612916	683.042
14NK01-22		39.3409	444.489	0.0885081	145.412	0.398719	0.113096	0.00270182	4.56438	0.079183	0.291109	0.00284965	0.564269	1850.01	43.2075	1742.79	14.4978	1647.07	14.2559	94%		317.158	5.0976	436.451	0.708923	0.0567036	1.07879	0.0605371	0.873277	2.19947	0.723085	15.7919	5.22784	50.1987	14.5701	52.5853	9.31706	79.2249	14.5966	7.4782	0.375092	686.153
14NK01-23		80.7134	704.961	0.114493	240.328	0.00638985	0.112362	0.00329203	4.70445	0.0786375	0.302276	0.00244203	0.48331	1838.89	58.1775	1768.03	14.0489	1702.58	12.1232	96%		442.911	6.76344	638.432	0.883195	0.0279916	2.95649	0.0417322	0.682477	2.74666	0.233988	20.2697	6.4249	64.3818	20.9931	83.3538	17.2549	158.918	32.5034	12.9735	0.0958718	710.289
14NK01-24		39.7636	438.192	0.0907447	143.713	0.556664	0.11623	0.00196289	4.72717	0.0753761	0.29444	0.00225366	0.48002	1899.08	30.56	1772.07	13.4178	1663.68	11.2593	93%		296.903	4.87196	365.152	0.597502	0.0448553	0.800386	0.0231505	0.565914	2.18046	0.141781	16.3876	5.25769	46.106	11.84	36.6435	6.32952	48.9825	8.96402	4.42552	0.072512	682.398
14NK02-01		75.7013	254.811	0.297089	95.6807	0	0.111109	0.00218108	4.93324	0.101033	0.320708	0.00267102	0.406665	1817.59	35.1875	1807.96	17.3339	1793.19	13.0732	99%		289.168	4.88634	210.976	1.11814	0.00664	13.8783	0.140401	2.41132	2.66544	0.37168	11.3452	3.55028	30.4581	6.73307	19.0611	2.60826	17.7033	2.69292	1.92039	0.206635	682.641
14NK02-02		160.252	163.296	0.981356	37.3654	0.114387	0.111228	0.00249809	5.05472	0.11742	0.328391	0.00294608	0.386195	1820.37	36.1125	1828.54	19.7307	1830.58	14.3309	99%		292.3	7.98033	35.8013	0.26767	0.0100241	14.4692	0.133877	2.89603	3.06322	0.187035	5.66971	0.873646	5.60868	1.1221	3.24016	0.526255	3.5297	0.527614	0.752894	0.137207	724.983
14NK02-03		36.9177	284.167	0.129916	103.094	0.093186	0.112111	0.00185306	5.04807	0.0877468	0.324883	0.00235598	0.417194	1835.19	30.715	1827.43	14.7837	1813.53	11.5051	99%		274.631	7.13267	110.055	1.21472	0.0230279	6.18124	0.102525	1.69606	6.21892	1.17102	23.4076	4.09238	21.3521	3.68234	10.3035	1.60322	13.2871	2.63981	0.912419	0.296724	714.962
14NK02-04		93.4371	335.176	0.278771	21.6206	0	0.115348	0.00333972	5.27706	0.149571	0.331801	0.00365266	0.388396	1887.04	52.16	1865.16	24.228	1847.11	17.7084	99%		210.189	9.99597	23.9653	0.705276	0.0066194	13.5421	0.167014	3.64797	6.72273	0.676206	11.626	1.54152	5.54294	0.790705	1.48856	0.160653	0.953623	0.158588	0.110362	0.233838	745.704
14NK02-05		66.9313	815.825	0.0820413	274.447	0	0.117689	0.00190483	5.02699	0.0789268	0.308868	0.00279124	0.575584	1921.3	29.015	1823.88	13.3547	1735.13	13.7793	95%		447.403	5.48711	705.663	1.15941	0.012994	1.31382	0.0578606	0.808467	3.3535	0.181836	23.2405	8.03182	80.3575	23.5157	84.9637	15.625	130.977	25.0632	8.72508	0.0629696	692.323
14NK02-06		70.3362	368.957	0.190635	65.5234	0.171418	0.112859	0.0021476	5.04657	0.096348	0.322593	0.00268719	0.436312	1855.56	33.49	1827.17	16.2271	1802.38	13.1337	98%		180.121	8.58445	48.5926	1.05057	0.010233	10.0873	0.134177	2.83463	6.63051	0.730842	14.9063	2.18069	9.52398	1.50785	3.46206	0.431496	2.96625	0.389084	0.211179	0.224744	731.604
14NK02-07		153.099	555.844	0.275435	32.7408	0.402889	0.112781	0.00345948	4.91907	0.129752	0.316494	0.00338645	0.405646	1855.56	55.555	1805.53	22.2921	1772.58	16.6099	98%		294.963	5.46886	32.8362	0.185758	0.00697705	17.3827	0.145537	2.70929	3.42716	0.337615	5.62666	0.875405	5.35385	0.994491	2.61508	0.479757	2.86098	0.42064	0.604836	0.235046	692.042
14NK02-08		60.1366	573.761	0.104811	199.429	0.234819	0.113804	0.00217273	4.93539	0.0913261	0.312604	0.00220619	0.381394	1860.81	33.7975	1808.33	15.6717	1753.51	10.8762	96%		345.366	7.67581	524.567	0.964941	0.00704648	0.99203	0.0261573	0.704455	2.82744	0.129704	19.3036	6.65115	64.0527	17.4783	58.1604	9.74575	77.9262	13.5657	5.68565	0.0536735	721.488
14NK02-09		16.7911	256.712	0.0654084	93.3557	0.0630968	0.111546	0.00208252	5.12042	0.0952144	0.330992	0.00254046	0.41276	1824.99	33.7975	1839.5	15.8456	1843.19	12.3444	99%		273.97	9.55367	128.244	0.494265	0.0142985	3.25247	0.0371571	0.603524	2.03094	0.542085	11.958	2.82946	18.5164	4.07677	11.9837	1.8834	16.3224	3.18655	2.15596	0.336289	741.471
14NK02-10		68.2584	447.71	0.152461	55.5991	0.256302	0.113417	0.00211441	4.76239	0.0872636	0.302978	0.00223007	0.401697	1854.63	33.6425	1778.29	15.4241	1706.06	11.0715	95%		185.264	6.42378	56.8571	0.846599	0.00819014	9.30571	0.0474352	1.48219	3.08675	0.456905	8.48871	1.3731	7.51019	1.96413	8.06625	2.11313	23.6347	5.30873	5.05972	0.272884	705.801
14NK02-11		119.704	776.853	0.154089	39.5461	0	0.113828	0.00236678	5.27136	0.112392	0.334897	0.00361014	0.505592	1861.42	32.5625	1864.24	18.2412	1862.08	17.4629	99%		243.903	6.51962	48.2579	0.50762	0.00589919	11.1361	0.13361	2.41116	3.69521	0.227012	6.9216	0.989051	6.29982	1.60743	5.1556	0.864141	6.62926	1.08348	1.26646	0.13723	707.086
14NK02-12		28.477	478.605	0.0595	63.733	0	0.111306	0.00219279	4.85581	0.0971366	0.314851	0.0025545	0.405583	1820.68	36.265	1794.62	16.8874	1764.53	12.5603	98%		224.469	6.36448	37.9725	1.29627	0.00378163	5.72178	0.0682657	1.12558	2.64272	0.499053	11.6955	1.6817	7.70997	1.31107	2.89124	0.400947	2.4592	0.424684	0.293782	0.274433	704.997
14NK02-13		149.331	533.496	0.279911	60.7906	0.115817	0.113501	0.00238321	4.93592	0.104491	0.313816	0.0024861	0.374224	1857.41	38.4275	1808.42	17.9163	1759.46	12.2353	97%		273.875	7.58069	115.462	0.247585	0.0402098	12.5882	0.190042	3.52378	4.22817	0.317139	9.28497	1.90784	13.7795	3.56091	14.4839	3.12824	33.7815	7.19575	6.27009	0.154742	720.373
14NK02-14		15.0705	406.224	0.0370989	126.386	0.267169	0.113624	0.00215435	4.42293	0.0866761	0.280868	0.00255892	0.464904	1858.34	29.4725	1716.64	16.2711	1595.73	12.9074	92%		382.399	6.52557	375.464	0.50642	0.0114464	0.879119	0.0141697	0.508458	1.8959	0.284612	11.8727	4.31944	38.9354	10.6574	37.8227	8.13922	79.2443	15.6406	10.6582	0.183398	707.166
14NK02-15		156.777	778.263	0.201444	42.1594	0	0.113677	0.00277058	5.05696	0.12193	0.322278	0.0030633	0.394219	1858.95	43.83	1828.92	20.478	1800.85	14.9659	98%		249.423	5.56579	59.3612	0.348346	0	12.0041	0.171298	3.13435	4.20214	0.276028	8.02276	1.30731	8.67625	1.96011	5.98818	1.12793	8.27141	1.35323	1.36466	0.145338	693.525
14NK02-16		75.0065	887.729	0.0844926	48.0758	0.356371	0.109712	0.00249207	5.05111	0.113926	0.333619	0.00295633	0.392884	1794.75	40.9	1827.93	19.1574	1855.9	14.3253	98%		288.856	7.67484	43.5489	0.435167	0.011868	11.0444	0.176381	2.65284	3.23438	0.221425	5.93845	1.02961	5.92673	1.38912	4.49724	0.727393	5.61297	0.94961	1.29375	0.15446	721.477
14NK02-17		82.2278	803.666	0.102316	43.526	0.313404	0.112572	0.0025838	5.00082	0.117223	0.321641	0.00278568	0.369477	1842.6	42.13	1819.46	19.8736	1797.74	13.622	98%		237.933	7.56817	44.6064	0.730528	0.0195677	8.35752	0.0785251	1.80743	4.31327	0.657139	11.4231	1.87412	8.67621	1.33576	3.1612	0.449408	2.74472	0.322575	0.228467	0.28621	720.226
14NK02-18		15.1527	308.052	0.0491889	99.7082	0.0641271	0.110538	0.00189354	4.57345	0.0905204	0.299395	0.00349885	0.590444	1809.26	31.1725	1744.44	16.5338	1688.31	17.3821	96%		254.344	6.22259	186.854	0.313062	0.0054693	1.22894	0.0355945	0.921587	3.79968	0.541714	20.7321	5.34249	32.4121	5.89771	13.2659	1.78693	12.0169	1.84994	0.721925	0.186594	703.049
14NK02-19		34.214	386.831	0.0884469	122.863	0	0.110426	0.00243807	4.32574	0.107522	0.282873	0.00284915	0.405216	1806.48	44.9125	1698.28	20.5322	1605.82	14.3432	94%		287.752	5.44484	276.29	1.33746	0.0189036	1.88029	0.046838	1.25904	2.65591	0.555477	16.5418	3.63878	31.0898	8.70042	37.1491	7.8889	80.3693	16.2282	7.93719	0.256208	691.671
14NK02-20		20.4192	306.637	0.0665909	101.41	0	0.111116	0.00220122	4.65646	0.0983356	0.303121	0.00273653	0.427493	1817.59	36.27	1759.45	17.6926	1706.77	13.5687	96%		244.8	7.5519	173.041	0.43052	0.00767771	1.58752	0.0256873	0.801024	3.65387	0.547896	19.1388	4.7365	27.923	5.48216	16.7506	3.1725	33.9398	6.91761	2.92429	0.200303	720.033
14NK02-21		105.052	778.656	0.134914	40.2407	0.160055	0.111235	0.00324798	5.01744	0.141278	0.327297	0.00326068	0.353814	1820.37	53.245	1822.27	23.8714	1825.26	15.8671	99%		163.031	9.59972	38.2059	0.631245	0.0170951	18.9545	0.249982	4.1994	7.07421	0.558141	12.6853	1.5167	7.33982	1.17023	2.31235	0.257288	1.80799	0.254198	0.162125	0.180127	741.919
14NK02-22		51.2547	818.548	0.0626166	110.554	0.33816	0.109349	0.00208018	5.01107	0.0994114	0.331452	0.00283236	0.430748	1788.58	39.8175	1821.19	16.838	1845.41	13.7495	98%		384.189	7.23489	112.751	0.4089	0.0344888	21.3081	0.72379	12.0787	12.9238	0.557652	21.4288	3.15712	18.3271	3.727	10.1083	1.5233	11.1975	1.58599	0.598798	0.102445	716.221
14NK02-23		40.886	550.305	0.0742971	30.5934	0.0326172	0.114521	0.00306156	5.10435	0.125348	0.324153	0.00302262	0.379714	1872.53	43.5175	1836.83	20.8874	1809.98	14.7475	98%		232.972	10.3006	50.2171	0.114894	0.019016	17.6009	0.166868	3.8999	4.09881	0.420405	7.35743	1.23545	7.50943	1.69548	5.72368	1.04009	8.6185	1.468	1.61427	0.234045	748.531
Note: r is the error correlation between 207Pb/235U and 206Pb/238U. T*, temperature calculated using the Ti-in-Zircon thermometry of Ferry and Watson, 2007.
Reference:
Ferry, J. M. & Watson, E. B. (2007). New thermodynamic models and revised calibrations for the Ti-in-zircon and Zr-in-rutile thermometers. Contributions to Mineralogy and Petrology 154, 429-437.

## Sheet: T8
Supplementary Table 8 Monazite U-Pb-O isotopes and trace elements
spot #	Comment	Th (ppm)	U (ppm)	Th/U	Pb total (ppm)	Pb common (ppm)	207Pb/206Pb	±s	207Pb/235U	±s	206Pb/238U	±s	r	207Pb/206Pb (age/Ma)	±s	207Pb/235U (age/Ma)	±s	206Pb/238U (age/Ma)	±s	Concordance	delta O18 (‰)	2SE	Elements (ppm)	Y	La	Ce	Pr	Nd	Sm	Eu	Gd	Tb	Dy	Ho	Er	Tm	Yb	Lu
14NK02-1		43643.1	2096.08	20.8213	3365.23	2.29725	0.111144	0.0017298	3.97998	0.0621627	0.259286	0.00203461	0.502403	1818.21	27.625	1630.12	12.7229	1486.19	10.4463	90%	9.34375	0.131708		7621.1	129678	237972	26176.6	102201	16052.7	476.251	9529.56	823.412	2698.2	311.153	454.142	33.1861	119.456	10.1988
14NK02-2	Fig. 3S	29319.8	2473.13	11.8553	2690.33	0	0.110426	0.00156794	4.03718	0.0547208	0.264901	0.00184261	0.513185	1806.48	25.6175	1641.72	11.0869	1514.87	9.42618	91%	9.70284	0.136267		4901.7	142948	245719	26597.3	97236.1	15823	218.651	7952.65	564.352	1666.66	191.554	313.707	23.5588	82.5142	7.18353
14NK02-3		93391.2	670.544	139.277	6552.24	0	0.113725	0.00281726	4.0848	0.0748843	0.260945	0.00207312	0.433368	1861.12	45.5275	1651.27	14.9957	1494.67	10.6293	90%	9.29693	0.124398		478.838	97501.8	242386	31230	111669	6871.97	76.7774	2105.29	108.476	232.092	21.437	26.7362	1.17585	4.92879	0.308034
14NK02-4		51962.6	955.261	54.3963	4612.7	0	0.11564	0.00170578	5.08614	0.0764104	0.31901	0.00254001	0.529987	1900	25.9225	1833.8	12.8088	1784.89	12.4512	97%	9.35471	0.185372		396.457	132707	244483	27123.7	102224	14616.3	101.854	5428	210.48	298.658	15.3698	17.4402	0.538617	2.31088	0.0850603
14NK02-5	Fig. 3M	58216	1032.26	56.3969	4506.2	6.49473	0.11433	0.00290789	4.41273	0.070533	0.279471	0.00181745	0.406856	1869.44	40.5825	1714.73	13.2827	1588.7	9.19704	92%	9.2277	0.134458		263.47	128940	245417	27612.8	105830	12753.8	136.891	3283.62	117.926	183.924	10.6042	13.9322	0.538616	2.32798	0.157288
14NK02-6		158544	728.075	217.758	13156.9	0	0.114535	0.00218072	4.96562	0.0852701	0.315169	0.00246961	0.456313	1872.53	33.795	1813.49	14.5658	1766.09	12.1425	97%	9.71628	0.130472		334.579	77713.7	214761	29274.6	103780	4962.25	47.4174	1252.43	70.5035	159.95	13.5985	21.6655	0.850747	3.37252	0.291627
14NK02-7		142944	682.503	209.44	12131	0	0.114779	0.0020396	5.14578	0.0888089	0.32513	0.00253272	0.451363	1876.24	32.56	1843.7	14.7262	1814.73	12.36	98%	9.3821	0.158299		310.963	82162	220024	29722.2	107682	5772.94	47.4004	1428.39	69.973	151.384	13.0246	19.5377	1.01401	2.74008	0.270584
14NK02-8		49535.5	911.884	54.3221	3453.3	0	0.10976	0.00219856	3.78252	0.0732898	0.249809	0.00210539	0.434971	1795.37	36.4225	1589.04	15.5977	1437.49	10.8871	89%	9.21376	0.127812		556.836	137317	244891	26795.4	102119	14481.7	100.302	5437.43	238.002	376.709	22.7379	25.1057	1.35293	3.84432	0.30981
14NK02-9		49660	762.728	65.1084	3318.88	0.831987	0.109986	0.00226642	3.66443	0.0705627	0.241921	0.00171908	0.369025	1799.08	37.3475	1563.66	15.3973	1396.67	8.95504	88%	9.23219	0.121404		271.433	136330	247754	26494	101890	14246	100.625	4681.09	167.971	213.593	10.853	12.2687	0.51962	2.5793	0.205161
14NK02-10		58539	1543.96	37.9149	3922.2	0	0.110656	0.00169269	3.65025	0.0572488	0.238754	0.0015062	0.402241	1810.18	27.7775	1560.56	12.5453	1380.22	7.87352	87%	9.37961	0.128014		316.145	124886	244939	27985.3	108082	13189.2	170.657	3365.85	123.453	197.825	13.9276	19.0539	0.915046	2.95887	0.336218
14NK02-11		33399.8	3105.6	10.7547	2365.16	0	0.108611	0.00139628	3.00868	0.0386568	0.200705	0.00141798	0.549872	1776.24	22.995	1409.82	9.83842	1179.11	7.6395	82%	9.8124	0.12348		290.847	136376	256012	27996.7	103532	13048.6	247.078	3039.98	115.049	189.33	13.5739	19.7656	0.803491	3.97842	0.315732
14NK02-12		62766.8	2305.94	27.2196	3820.47	3.92	0.110536	0.00169054	3.18306	0.0451874	0.208945	0.00145532	0.49063	1809.26	27.78	1453.06	11.0131	1223.2	7.78822	82%	9.74168	0.124619		211.452	105589	245755	30966.1	119911	12906.3	190.698	2903.89	97.1948	147.745	9.78496	15.8968	0.404963	1.72485	0.139997
14NK02-13		44305.2	1675.65	26.4407	2159.29	0.162496	0.107436	0.0018798	2.5434	0.0456676	0.171555	0.00138477	0.449553	1766.66	32.1025	1284.55	13.1154	1020.67	7.6395	77%	9.32034	0.142181		2697.24	130594	245109	27902.6	106154	15647.9	223.224	7365.73	483.549	1245.69	123.673	142.214	8.02426	22.0367	1.6258
14NK02-14		62011.9	1419	43.7012	3072.03	0	0.110136	0.00206882	2.65668	0.047954	0.174932	0.0012293	0.389318	1801.54	33.4925	1316.5	13.3459	1039.23	6.76804	76%	9.4334	0.131946		191.224	104141	250743	31262.7	122185	11702.6	171.461	2414.42	81.7812	122.931	7.78258	12.4602	0.398664	1.12982	0.147324
14NK02-15		78395.7	802.785	97.6546	3495.25	2.28553	0.108312	0.00263621	2.4767	0.0557161	0.166414	0.00144475	0.385919	1772.22	44.445	1265.25	16.2948	992.324	8.00268	75%	9.24265	0.141843		418.206	109501	253014	30461.6	109448	7848.82	112.804	1911.58	103.133	221.613	17.9546	24.2579	1.15725	5.08065	0.265759
14NK02-16		54145.1	698.445	77.5224	2330.3	5.85546	0.112258	0.00442551	2.55681	0.0588397	0.165161	0.00189112	0.497554	1836.12	70.5275	1288.38	16.8201	985.394	10.4764	73%	9.40949	0.124494		903.457	131608	245213	27690.3	104534	12964.9	385.822	3562.97	145.14	329.075	34.1266	60.0358	5.79141	30.5616	3.59089
14NK02-17		36708.8	1645.3	22.3114	202.951	1.6041	0.0509399	0.00303861	0.115628	0.00614063	0.0166592	0.00026122	0.295258	238.955	137.018	111.101	5.58938	106.507	1.65733	95%	9.62514	0.135644		18820	137890	234465	23242.2	86207.7	13124.5	1092.75	10270.5	1487.93	7006.01	778.914	868.736	41.7438	106.234	6.76661
14NK02-18		8692.94	1283.17	6.77458	62.0535	0.990577	0.0537267	0.00323402	0.122228	0.00665392	0.0169065	0.000271986	0.295518	366.72	141.65	117.09	6.02094	108.075	1.72517	91%	9.48519	0.142981		17124.1	153504	239360	24350.3	87851.3	14747.1	1072.38	14608.6	1953.99	7697.36	751.269	784.812	38.1209	99.3843	7.27102
14NK02-19		19823.2	2175.87	9.1105	132.249	0	0.0507006	0.00231739	0.119202	0.00456335	0.0170777	0.000236518	0.361772	227.845	105.54	114.348	4.14077	109.161	1.50025	95%	9.12411	0.128104		16148.4	165810	237251	22308	80670.4	12777.4	797.193	12000.2	1574.11	6392.58	670.983	683.556	33.4816	86.1403	6.39397
14NK02-20		8508.94	1270.89	6.69527	60.2179	1.69656	0.0510582	0.00357923	0.113247	0.00707505	0.0165744	0.000275393	0.265957	242.66	162.942	108.931	6.45352	105.97	1.74729	97%	9.44236	0.140659		17503	158203	246919	25047.7	87732.1	13690.2	1083.98	11803.6	1575.55	6753.64	737.442	809.833	41.1809	106.069	6.93622
14NK02-21		10641.3	1015.63	10.4775	68.1395	3.80555	0.0518546	0.0041071	0.116211	0.00773472	0.016688	0.000309394	0.278555	279.69	181.458	111.631	7.03645	106.69	1.96259	95%				15640.2	151895	251023	25225	91664.9	14515.7	1123.88	12036.6	1622.95	6479.16	657.251	631.986	27.8727	65.5051	3.88932
14NK02-22		45532.3	3666.51	12.4184	275.675	0	0.0500019	0.00222744	0.115408	0.00511493	0.0167828	0.000212277	0.285388	194.525	103.688	110.901	4.65685	107.291	1.34708	96%				13638.6	137305	218166	22492.8	84455.7	14978	1029.68	14395.1	1751.77	6174.41	554.302	487.452	21.2095	50.592	3.05391
14NK02-23		11154.2	1325.49	8.41517	76.286	0	0.0539108	0.00373175	0.121226	0.00689092	0.0168202	0.000294333	0.307842	368.57	152.76	116.183	6.24092	107.528	1.86691	92%				11147.2	163784	245677	24237.5	85893.9	14104.4	1304.59	13233.5	1768.81	5832	460.446	387.488	16.6023	36.0715	2.37777
14NK02-24		21701.2	2928.04	7.41149	149.337	0	0.0520956	0.00269717	0.120235	0.00607476	0.0168857	0.000224523	0.263175	300.06	149.055	115.285	5.50673	107.943	1.42453	93%				16259.8	160652	238155	22420.6	78086.5	12014.7	997.787	10125.8	1484.08	6357.63	652.639	691.863	36.3666	89.8438	5.8373
14NK02-25		9539.67	3726.92	2.55966	104.883	0	0.0468367	0.00179284	0.111561	0.00423236	0.0173182	0.000192097	0.292378	42.69	88.88	107.392	3.86685	110.685	1.21872	96%				19302.5	152440	238406	23949.4	88268.2	16326	1280.8	15669.9	2150.65	8424.45	816.825	784.164	35.0962	75.4523	5.38219
14NK02-26		29026	1646.05	17.6337	165.608	0	0.0511583	0.00338956	0.119932	0.00693148	0.0174305	0.000382255	0.37945	255.62	153.683	115.011	6.28489	111.396	2.42271	96%				17788.9	148556	226696	22051.5	77381.7	13048.4	941.11	11819.8	1694.53	7167.32	745.123	794.24	37.7204	99.8155	6.35261
14NK02-27	Fig. 3M	14132.4	1667.74	8.47398	93.5549	0.416669	0.0493974	0.00317968	0.116865	0.00703299	0.0172341	0.000246673	0.237836	164.9	149.98	112.226	6.39441	110.152	1.56435	98%				17818.4	153570	241445	24585.4	85778.5	13883.8	993.917	12696.7	1685.47	7066.34	736.123	761.739	38.1932	94.9735	6.82712
14NK02-28		27958.7	1660.63	16.8362	162.554	1.1437	0.0534674	0.00306829	0.122671	0.00688066	0.0167625	0.000298553	0.317538	350.055	129.615	117.491	6.22362	107.162	1.89375	90%				22752.5	142738	227475	22969.1	84718.7	14786.1	1843.11	14420.3	2053.84	8465.46	927.049	1243.65	84.1496	274.708	23.6606
14NK02-29		25962.1	1458.75	17.7975	145.058	2.89023	0.0524108	0.00318828	0.120444	0.00713876	0.0169295	0.000235499	0.234697	301.91	134.24	115.475	6.46985	108.221	1.49399	93%				18310.3	150342	237442	24149.9	85359.9	13549.5	1109.11	10943	1580.02	6916.17	766.316	856.946	44.1109	108.974	7.14395
14NK02-30	Fig. 3S	7828.78	1278.26	6.12457	56.3075	0	0.0511438	0.00324362	0.114891	0.00689687	0.0166845	0.00026339	0.262977	255.62	146.278	110.429	6.28175	106.668	1.67105	96%				17080.8	153520	250291	25001.9	87614.7	13913.6	1080.57	12300.2	1645.57	6835.82	712.399	748.723	38.5165	93.6782	7.04846
14NK02-31		20633.6	2081.75	9.91166	135.772	3.08718	0.058362	0.00334001	0.139851	0.0072675	0.0174478	0.000254702	0.280913	542.63	125.91	132.911	6.47454	111.506	1.61488	82%				16793.1	152105	234896	23379.5	86275.3	14112	1002.29	12637.7	1674.3	6937.09	670.558	667.328	29.4041	67.4553	4.43977
14NK02-32		11127.4	1608.69	6.91706	79.5991	0	0.0656186	0.00326904	0.149691	0.00705383	0.0168222	0.000254977	0.321654	794.445	103.698	141.639	6.23054	107.541	1.61754	72%				18910	153746	246181	24462.2	84931.5	13505.4	1081.64	11379.9	1587.78	7177.07	800.84	900.633	46.8695	122.013	8.98009
14NK02-33		49478.1	989.242	50.0162	252.832	2.95132	0.0715299	0.00469407	0.16328	0.00956492	0.0171017	0.000301852	0.301305	972.225	135.185	153.57	8.34951	109.313	1.91406	66%				10421.6	138426	232645	23529.4	87813	15583.2	1129.2	14066.7	1684.06	5492.07	437.195	378.977	16.3315	42.7771	2.79604
14NK02-34		22505.2	1119.43	20.1042	129.655	2.72518	0.0720102	0.00481583	0.173678	0.0114475	0.0176708	0.000365151	0.31351	987.04	137.037	162.606	9.90415	112.919	2.31385	63%				14657.9	154062	241107	23197.6	82911.5	13311	1374.47	12553.2	1677.02	6167.94	593.317	648.878	37.9925	110.719	9.13766
14NK02-35		45537.2	1270.84	35.8324	240.277	4.0118	0.0772519	0.00431124	0.178572	0.00975952	0.0169421	0.000267142	0.288509	1127.79	111.11	166.831	8.40895	108.301	1.69443	57%				12938.4	133098	230349	24772.3	90875.8	14243.6	1068.83	11638	1524.28	5842.16	550.884	534.91	26.1742	63.2981	4.79477
14NK02-36		13079	1215.15	10.7632	91.1893	0	0.0545019	0.00354069	0.147773	0.00882551	0.0200627	0.000390324	0.325756	390.79	146.282	139.944	7.80811	128.052	2.46767	91%				13350.5	165050	251957	23720.9	81420.7	13005	1499.34	12186.9	1515.27	5784.45	564.008	639.705	36.3672	109.678	8.11603
14NK02-37		7502.35	1209.89	6.20086	68.7065	0	0.0532948	0.00327084	0.157584	0.00892723	0.0217735	0.000386249	0.313138	342.65	140.722	148.586	7.83123	138.855	2.43802	93%				13883.3	170953	251568	23446.1	81196.7	12810.9	1526.72	10329.1	1439.54	5649.19	603.987	708.478	41.2956	118.147	8.41117
14NK02-38		32264.7	747.767	43.148	245.36	3.63092	0.0542639	0.00432461	0.179118	0.0115094	0.024783	0.000437769	0.274901	383.385	179.607	167.301	9.91186	157.814	2.75511	94%				16658.9	140795	238374	24298.1	90682.6	15112.1	1089.82	12124.7	1548.86	6333.07	764.873	1112.59	83.0249	315.698	25.9244
14NK02-39		12391.1	1304.44	9.49917	118.922	1.77789	0.05373	0.00300847	0.183688	0.00965951	0.0250287	0.000375696	0.285445	366.72	125.912	171.229	8.28688	159.36	2.36432	92%				16833.4	155425	240825	23747.4	87864.8	14161.4	1026.59	11864	1431.4	6222.64	743.521	1024.08	70.7956	249.151	21.1257
14NK02-40		1305.6	725.363	1.79992	27.1197	2.60682	0.0506507	0.00397659	0.176883	0.0111542	0.0259893	0.000518033	0.316089	233.4	183.31	165.375	9.62423	165.398	3.25609	99%				10806	171141	261338	25093.1	85108.2	10815	986.481	5985.67	757.804	3450.95	464.962	750.562	56.8046	200.354	17.3652
14NK01-1		30957.3	1552.94	19.9347	170.245	2.27216	0.0475576	0.00264108	0.108908	0.00544593	0.0166677	0.00020539	0.246429	76.02	135.165	104.966	4.98714	106.561	1.30359	98%				7769.97	144548	250982	26117.6	93215.3	13832.9	234.847	8048.67	779.499	2738.86	316.675	478.819	37.2364	135.744	10.9006
14NK01-2		59109.3	1679.29	35.1989	306.717	1.41683	0.050757	0.0029603	0.112114	0.00575582	0.0163402	0.000236259	0.281633	231.55	133.315	107.898	5.25569	104.485	1.4996	96%				8261.49	131439	237661	25407.9	95974	14283.6	235.473	8115.07	799.249	2876.22	339.087	530.21	40.4911	136.322	10.6588
14NK01-3		72352.7	1093.06	66.1931	356.561	4.79764	0.0513017	0.00309455	0.113592	0.00613843	0.0163579	0.00023808	0.269329	253.77	138.87	109.246	5.59757	104.597	1.51111	95%				4017.27	132814	235603	25200.2	95035.1	13655.1	381.364	6972.04	455.408	1284.95	146.723	280.511	30.781	167.911	18.4362
14NK01-4		70015.8	2498.46	28.0236	367.664	1.0169	0.0505228	0.00253007	0.113558	0.00541926	0.0165269	0.000178075	0.225783	220.44	116.65	109.215	4.94204	105.668	1.13072	96%				9148.51	127221	231953	25007.5	94417.7	14536.2	243.744	8660.63	860.767	3102.48	379.464	609.477	49.5264	184.544	15.7337
14NK01-5		70312.1	1383.89	50.8076	350.214	0.173156	0.0536596	0.00338299	0.119137	0.00656381	0.0166513	0.000244168	0.266153	366.72	142.577	114.289	5.95579	106.457	1.5493	92%	9.21924	0.134495		6495.31	135054	231298	24541.3	92375.5	14118.9	255.09	8586.14	773.002	2448.13	266.197	366.919	24.5026	87.5161	6.99255
14NK01-6		42138.6	1430.3	29.4614	218.841	1.0945	0.0476631	0.00299987	0.109954	0.00687675	0.0165725	0.000249145	0.240376	83.425	149.975	105.923	6.29125	105.958	1.58094	99%	8.32227	0.169861		8195.94	140307	247806	25785.7	96635.5	14293.6	239.238	8420.43	803.722	2892.03	335.686	509.172	35.7759	129.891	10.0663
14NK01-7		47870.9	1523.51	31.4215	246.79	2.22956	0.0523733	0.00346245	0.120596	0.00693194	0.0169483	0.000247062	0.253604	301.91	156.46	115.612	6.28159	108.341	1.56721	93%	8.31679	0.134017		8040.56	139687	244612	25687.4	94666.1	14073.3	227.689	8329.5	801.669	2855.25	328.316	480.75	34.6915	113.869	9.56846
14NK01-8		43941.7	1538.87	28.5546	227.224	3.19212	0.0516513	0.00316579	0.117414	0.00680961	0.0167264	0.000237562	0.24489	333.39	140.722	112.724	6.1883	106.933	1.50734	94%	8.64948	0.170331		8366.04	136033	243804	25688.4	95645.2	14182.8	232.896	8476.99	823.566	2943.18	342.048	513.212	36.6025	125.233	10.2466
14NK01-9		62222.2	1857.13	33.5046	316.779	0	0.0476202	0.00281704	0.110047	0.00531587	0.0169988	0.000223669	0.272389	79.72	137.02	106.008	4.86307	108.66	1.41898	97%	8.93037	0.145502		8549.57	133025	237061	24942.3	91894.1	13969.9	230.441	8402.04	838.701	2999.07	352.519	514.264	37.4088	125.03	10.0005
14NK01-10		49401.2	1963.46	25.1603	263.681	0	0.0539704	0.00305205	0.12093	0.0062436	0.0164899	0.000194938	0.22897	368.57	130.542	115.915	5.65625	105.434	1.23758	90%	8.70626	0.126011		8632.6	134327	240269	25499.7	95275.8	14648.2	249.384	8446.31	818.366	2875.05	355.415	571.202	45.9951	177.56	14.6747
14NK01-11		47935	1611.39	29.7475	253.084	0	0.0497992	0.00281409	0.117554	0.00586383	0.0173684	0.000288982	0.333555	187.12	133.315	112.852	5.32829	111.003	1.83208	98%	8.61362	0.179783		8766.89	140909	239960	25050.5	96011.8	14820.8	239.284	9590.12	906.97	3148.22	356.386	515.632	35.8356	119.878	9.24862
14NK01-12		62417.3	852.228	73.2401	310.315	1.65776	0.0532262	0.00381903	0.119627	0.00602032	0.0169999	0.000333925	0.390311	338.945	162.942	114.733	5.46035	108.667	2.11745	94%	8.60615	0.178969		1449.32	137522	242734	25585.5	98035.6	12993.8	379.549	5546.37	297.035	659.589	58.9308	83.5975	9.61168	66.5057	8.28276
14NK01-13		70953	2977.07	23.8332	381.179	0	0.0499009	0.00236183	0.115452	0.00511933	0.0168346	0.000188073	0.25195	190.82	111.095	110.941	4.66067	107.619	1.19374	96%	9.16545	0.199818		9592.17	127516	229377	24514.1	92598.1	14463.1	233.901	8769.83	887.84	3263.25	391.785	632.021	50.9972	188.044	15.4557
14NK01-14		53256.9	1682.65	31.6506	277.584	1.59865	0.0511219	0.00251407	0.118112	0.00532717	0.0169224	0.000230028	0.301382	255.62	119.427	113.359	4.83834	108.176	1.45935	95%	8.67737	0.175692		7490.56	135539	242628	25060.9	94681.6	13840	228.984	7964.39	761.303	2714.89	309.696	478.906	37.1162	133.558	11.9445
14NK01-15		45753.8	1397.59	32.7377	235.563	0.956622	0.0488069	0.00291799	0.111197	0.0062916	0.0166089	0.000226661	0.241193	138.975	133.31	107.059	5.74957	106.189	1.43842	99%	8.55087	0.136362		7686.25	137544	246493	26139.9	95656.7	14182.5	230.329	7949.65	770.734	2770.07	320.445	482.776	35.1598	123.111	10.1806
14NK01-16		73762.1	2336.54	31.569	387.401	2.34608	0.0499913	0.0028535	0.114253	0.00589461	0.0168922	0.000222579	0.255395	194.525	131.465	109.848	5.37209	107.984	1.41221	98%	8.83425	0.123406		8777.31	125341	231365	24902.1	93976.2	14303.7	230.204	8329.88	818.276	2954.6	360.291	593.177	45.9344	174.395	14.7215
14NK01-17		69854.1	2708.97	25.7862	375.367	1.45079	0.0498958	0.0024298	0.116688	0.00550546	0.0170694	0.000233334	0.289729	190.82	112.948	112.065	5.00659	109.108	1.4801	97%	8.58822	0.174386		9267.38	130210	230244	24838.5	92282.1	14267.8	240.21	8614.19	855.64	3152.62	376.836	616.168	51.3318	186.162	16.464
14NK01-18		67293.7	2391.86	28.1345	352.994	0	0.0472758	0.00243382	0.109118	0.00551976	0.0167225	0.000198708	0.234905	64.91	124.06	105.158	5.05377	106.908	1.26121	98%	8.42287	0.137739		8406.51	130823	236491	25119.9	93360.3	14085.1	227.492	8257.85	809.851	2931.99	351.158	543.044	42.6642	153.546	12.6064
14NK01-19		73361.9	1436.45	51.0718	366.077	0.353357	0.0560878	0.00322995	0.125538	0.00640907	0.0164559	0.000240671	0.286472	457.45	132.393	120.08	5.7824	105.218	1.52741	86%	8.72817	0.162573		6134.79	133062	232566	24654.6	93027.7	14206.4	268.001	8532.02	736.996	2381.24	253.583	345.225	25.347	88.2237	7.73393
14NK01-20		61337	3575.72	17.1538	344.526	6.42616	0.0591119	0.0021902	0.136692	0.00487151	0.0168693	0.000180512	0.300253	572.255	81.4675	130.093	4.35252	107.84	1.14583	81%	9.48669	0.118143		15240.8	128975	230090	25087.8	93874.8	14567.7	276.647	8393.27	871.344	3753.46	553.172	1132.38	114.95	457.207	38.5488
14NK01-21		60163.4	1524.46	39.4654	306.256	0	0.0605363	0.00340356	0.140778	0.00740915	0.016956	0.000223285	0.250209	633.35	120.353	133.737	6.59536	108.389	1.4166	79%	9.35769	0.139586		7410.02	131315	234448	25422.8	94974.5	14218.1	264.445	8336.01	776.676	2668.12	303.23	447.318	30.8586	114.894	10.2747
14NK01-22		71160.6	1005.79	70.7512	351.93	4.62313	0.0933875	0.00522949	0.224995	0.0109962	0.0178187	0.000277652	0.318829	1495.99	105.555	206.059	9.11565	113.855	1.7596	42%	8.83824	0.158299		1757.19	130272	234973	26183.4	99001	13273.8	378.413	5443.76	285.337	664.646	69.6615	110.926	12.2757	72.5512	8.5432
14NK01-23		53493.4	910.89	58.7265	2544.95	2.60722	0.112099	0.00215291	2.73727	0.0510594	0.177156	0.00126473	0.382722	1835.19	67.4375	1338.63	13.9022	1051.42	6.94924	75%	8.5683	0.141095		2515.51	136837	242957	25308.3	96771.3	14027.4	171.429	7527.58	532.123	1265.43	106.156	117.927	6.53651	23.1238	1.92837
14NK01-24		71280.7	394.098	180.87	2181.94	0	0.10415	0.00333202	1.88584	0.0577039	0.132288	0.00147797	0.365125	1699.08	63.7375	1076.12	20.3163	800.907	8.42555	70%	8.74211	0.106611		220.107	121889	239398	27896.4	109155	14896.1	99.6262	4633.55	135.585	153.132	8.95931	14.2574	0.552221	2.80831	0.266892
Note: r is the error correlation between 207Pb/235U and 206Pb/238U

## Sheet: T9
Supplementary Table T9 Representative rare earth element compositions of garnet
Sample	Texture	Y	Zr	Nb	Nd	Sm	Eu	Gd	Tb	Dy	Ho	Er	Tm	Yb	Lu
14NK02	Bulk garnet	169.981	91.9689	0.0837121	3.26099	7.83177	0.924779	19.0515	4.35987	33.635	6.47568	17.3835	2.15733	13.3991	1.93142
14NK02	Bulk garnet	117.517	73.4705	0.537358	6.01724	10.0115	0.937372	18.8828	3.95153	25.6336	4.69343	12.4838	1.89231	10.5577	1.77736
14NK02	Bulk garnet	119.007	65.9533	0.85598	4.75611	9.5878	0.86255	19.218	3.70564	22.8171	4.46963	12.081	1.72383	10.1265	1.51958
	ave	135.502	77.1309	0.49235	4.67811	9.1437	0.908234	19.0508	4.00568	27.3619	5.21291	13.9828	1.92449	11.3611	1.74279
14NK01	Bulk garnet	120.716	71.723	0.125538	6.57044	11.636	1.0288	19.9529	3.9282	25.8493	4.55542	13.5029	1.67568	10.7814	1.71652
14NK01	Bulk garnet	158.996	67.8763	0.117647	3.61303	7.91717	0.975525	19.5921	4.13688	29.5603	5.52499	15.1222	2.00426	12.9612	1.90773
14NK01	Bulk garnet	114.228	87.8871	0.215138	1.3571	7.02071	1.00236	19.8265	5.13451	35.4669	6.75924	18.3624	2.44872	17.0438	2.92033
	ave	131.314	75.8288	0.152774	3.84686	8.85796	1.00223	19.7905	4.39986	30.2922	5.61322	15.6625	2.04289	13.5954	2.18153
14NK02	Chemical dike	259.151	15.186	0.364788	0.150937	0.414743	0.245784	6.88086	3.06683	37.0772	8.44153	24.7697	3.26938	20.9484	2.69734
14NK02	Chemical dike	216.624	6.49905	1.13637	0.130599	0.62189	0.418441	5.28963	2.78045	33.496	8.12616	23.4189	3.08766	19.8609	2.57761
14NK02	Chemical dike	185.14	2.13701	1.65727	0.141533	0.482851	0.609901	7.16319	2.66883	28.7685	6.55768	19.7429	2.76756	16.3823	2.13635
	ave	220.305	7.94069	1.05281	0.141023	0.506495	0.424709	6.44456	2.8387	33.1139	7.70846	22.6438	3.04153	19.0639	2.47044
14NK01	Chemical dike	126.148	8.84551	0.352382	0.0951586	0.533831	0.192765	4.66681	2.36776	21.9447	4.38663	11.7984	1.65248	9.52498	1.38028
14NK01	Chemical dike	170.414	20.3867	0.187178	0.437545	0.761195	0.328905	7.45683	2.81347	24.0615	4.9623	13.9686	2.09065	11.3327	1.97066
14NK01	Chemical dike	174.615	1.44469	0.127134	0.0883264	0.317726	0.31361	5.28963	2.65584	31.2228	6.9003	18.9723	2.56273	15.36	2.05
14NK01	Chemical dike	134.391	2.49046	0.0152651	0.166173	0.629722	0.421643	6.41173	2.8196	24.4749	4.59304	11.6215	1.3451	9.24361	1.06378
	ave	151.392	8.29184	0.17049	0.196801	0.560619	0.314231	5.95625	2.66417	25.426	5.21057	14.0902	1.91274	11.3653	1.61618

## Sheet: T10
Supplementary Table T10 Bulk rock compositions used for phase equilibria modeling (mol. %)
Sample/Method	SiO2	TiO2	Al2O3	Fe2O3	FeO	MnO	MgO	CaO	Na2O	K2O	H2O
Measured bulk-rock composition	54.2351	2.1028	18.99	0.408351	8.27207	0.17	4.33185	2.03618	1.54554	1.03041	6.87899
Measured bulk-rock composition with bulk-garnet removed	54.6898	2.19041	19.1646	0.36894	7.47578	0.130909	4.14435	1.98769	1.60994	1.07334	7.16561
Note: FeO is total iron, and Fe2O3 is determined by chemical titration, and H2O is set to excess at subsolidus conditions.

[truncated: 2 more sheets: T11, T12]
